# Supplementary material
Source: PubMed Central journal article supplement (PMC2781050)

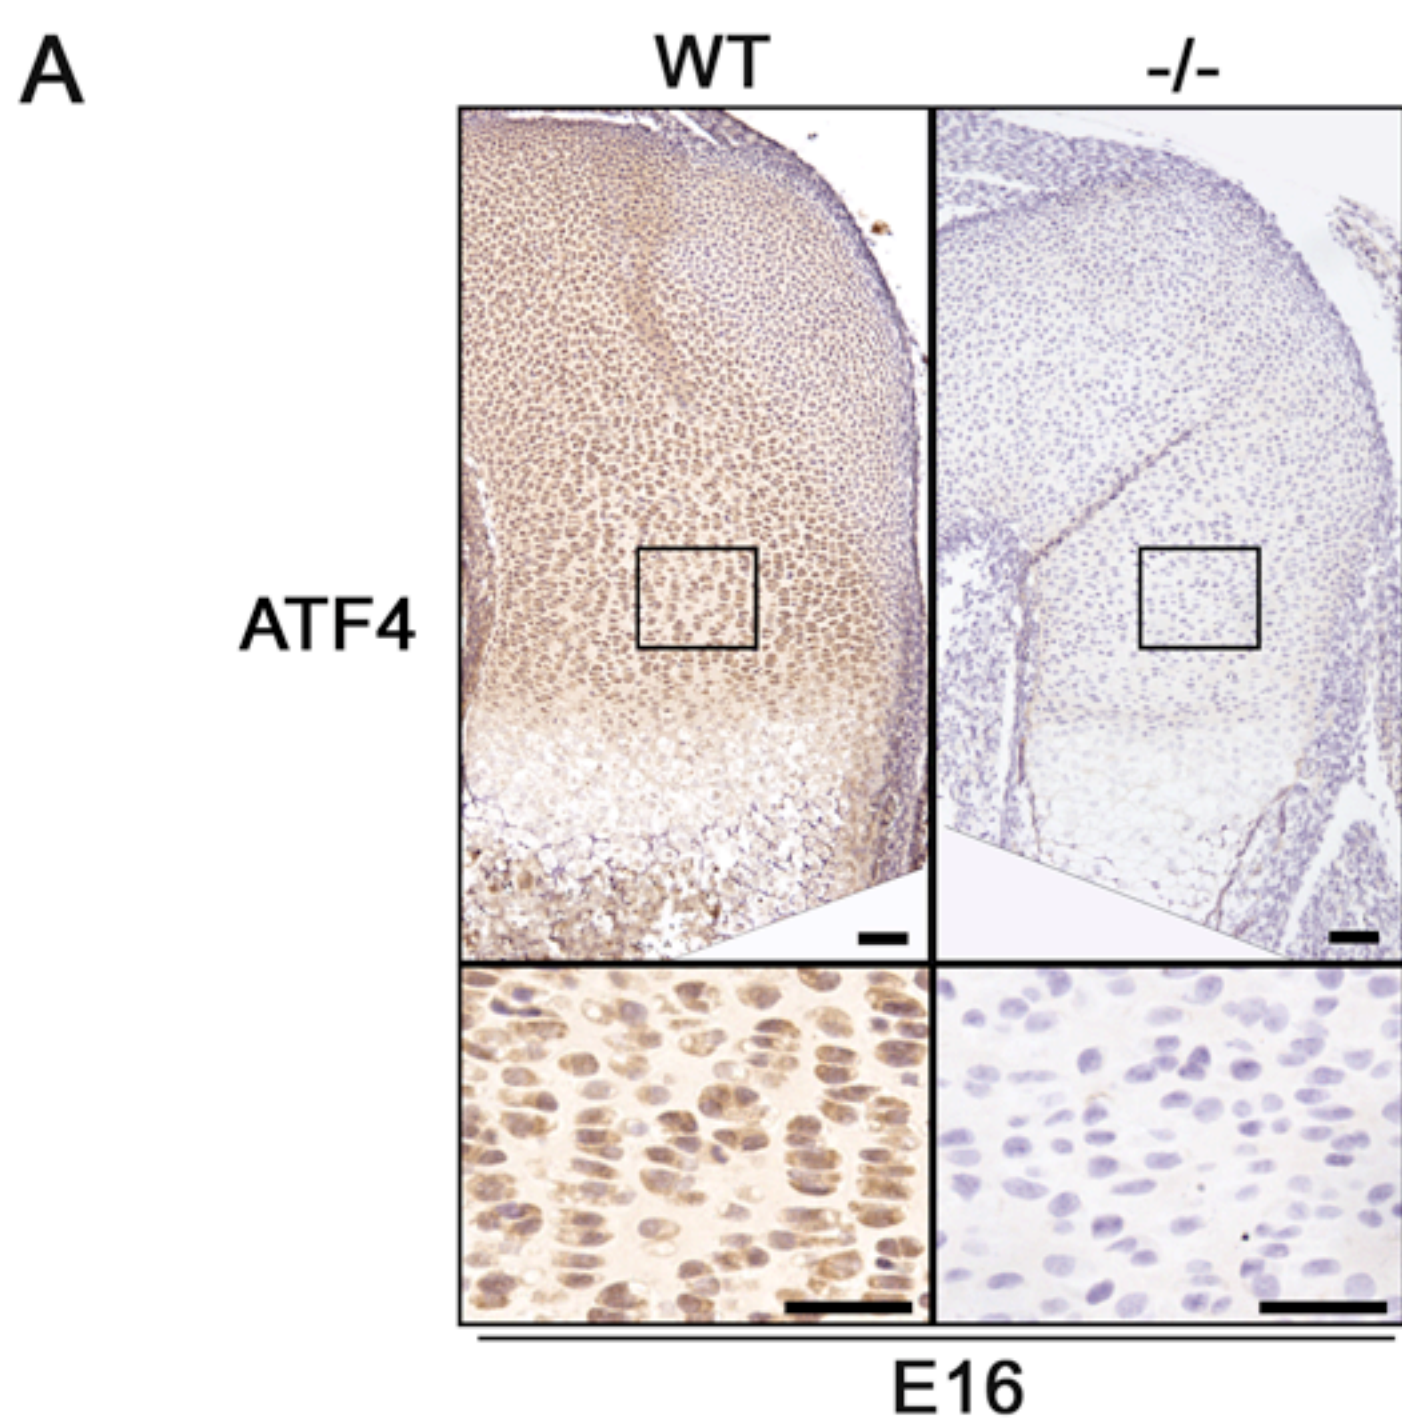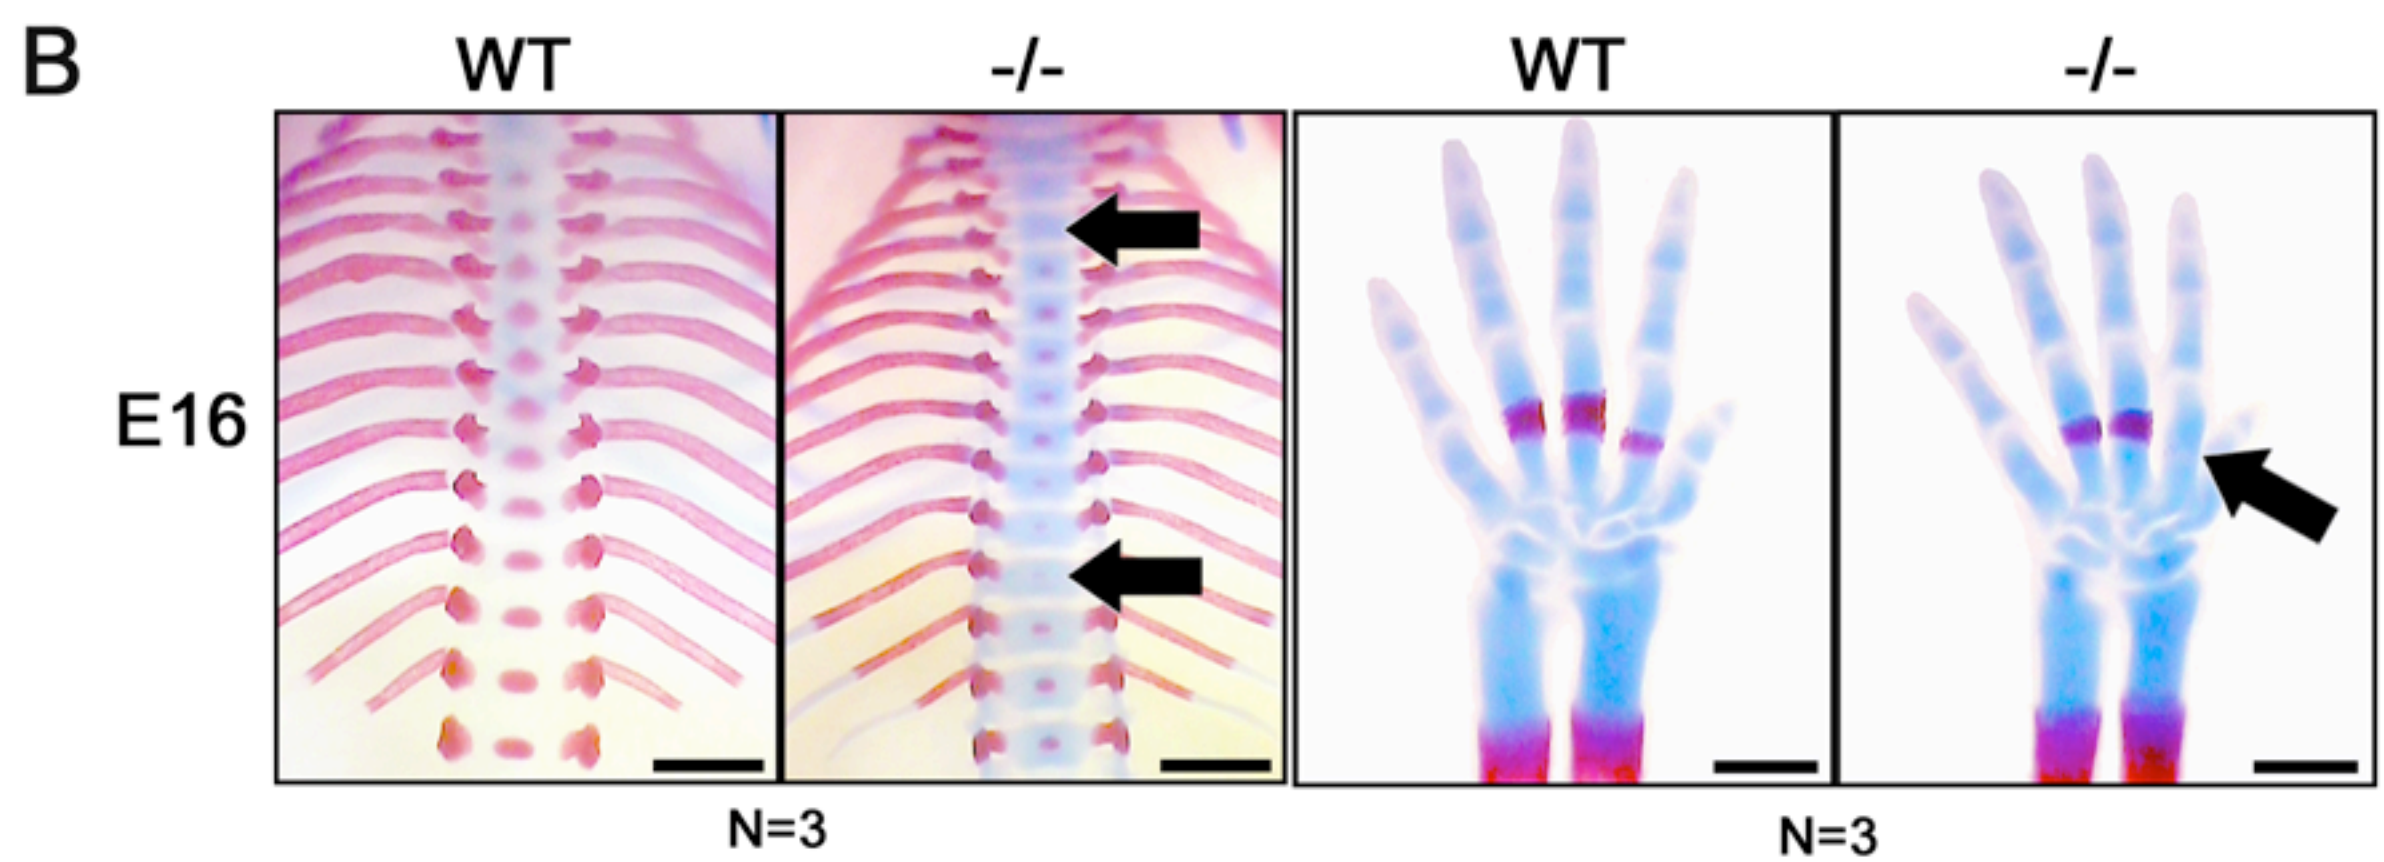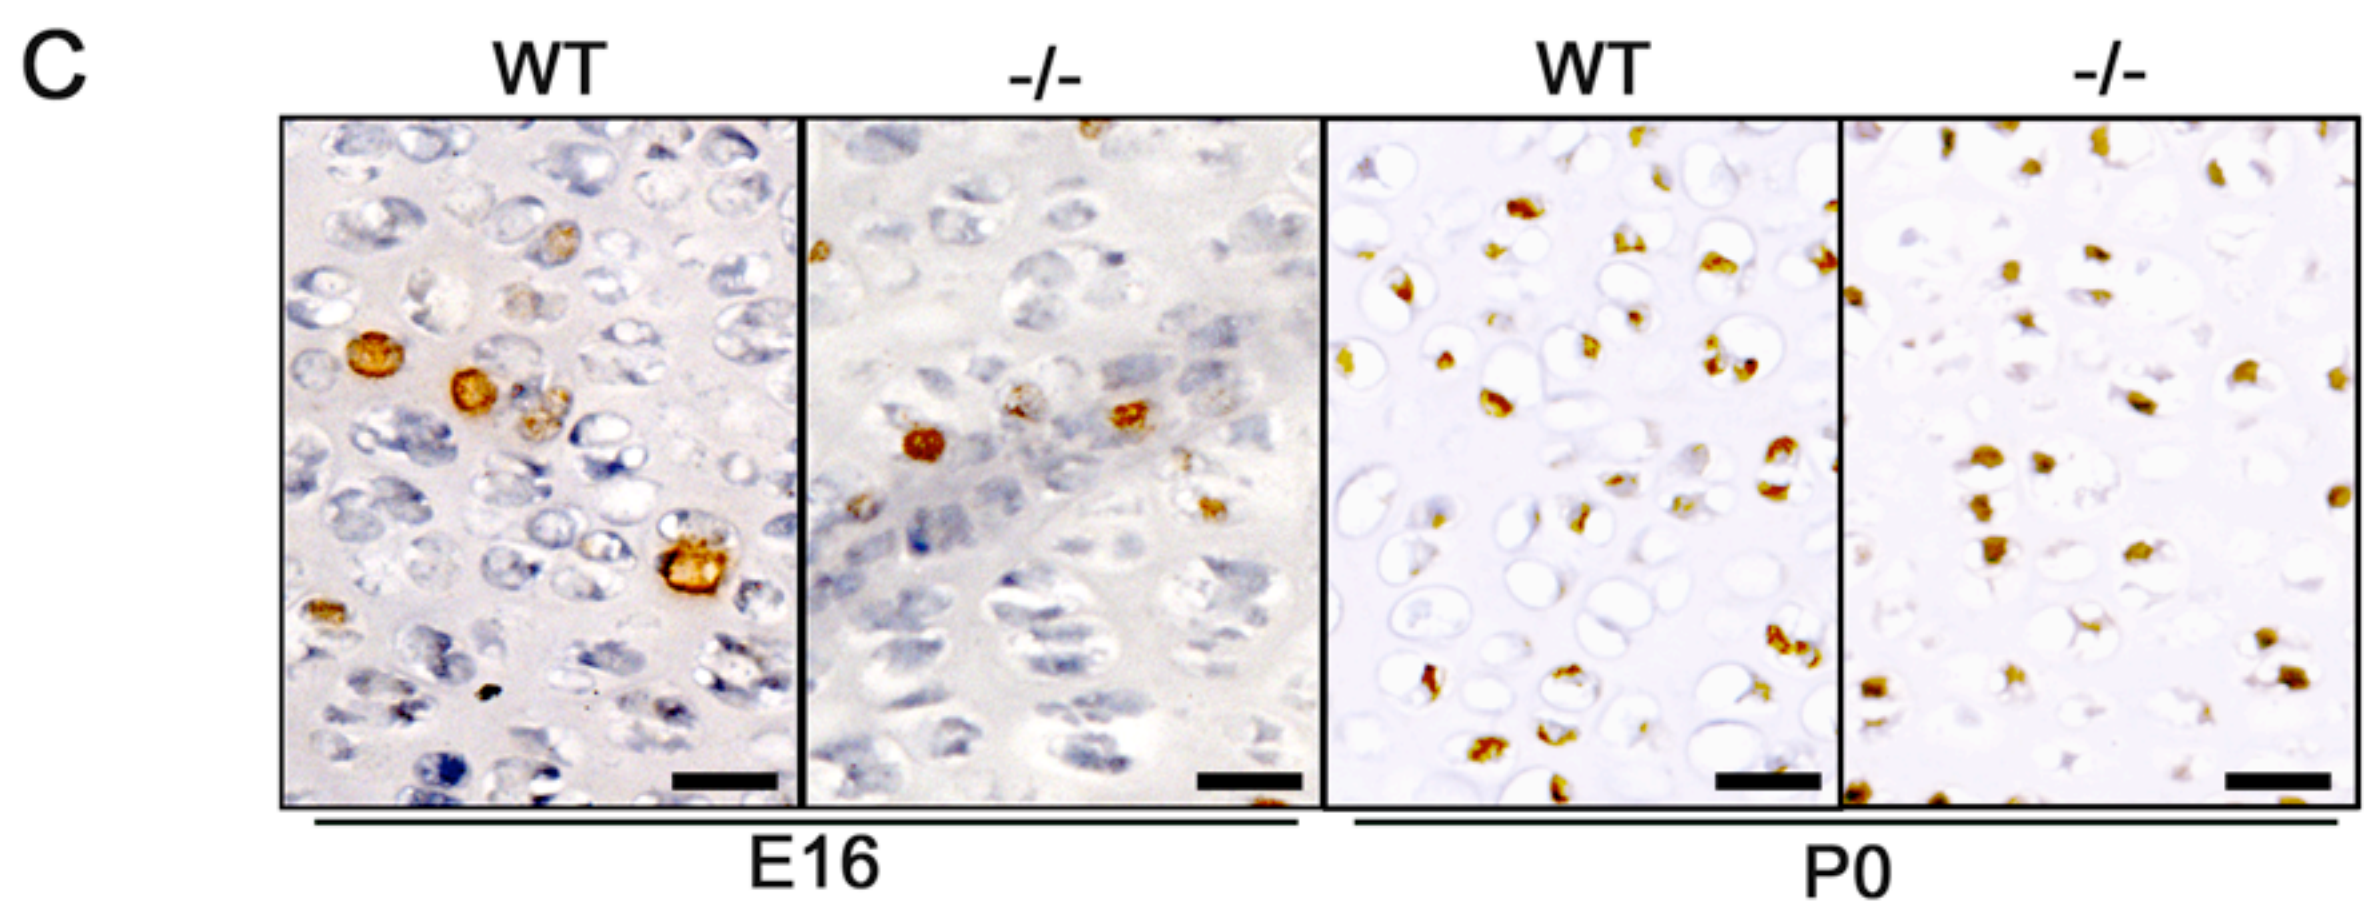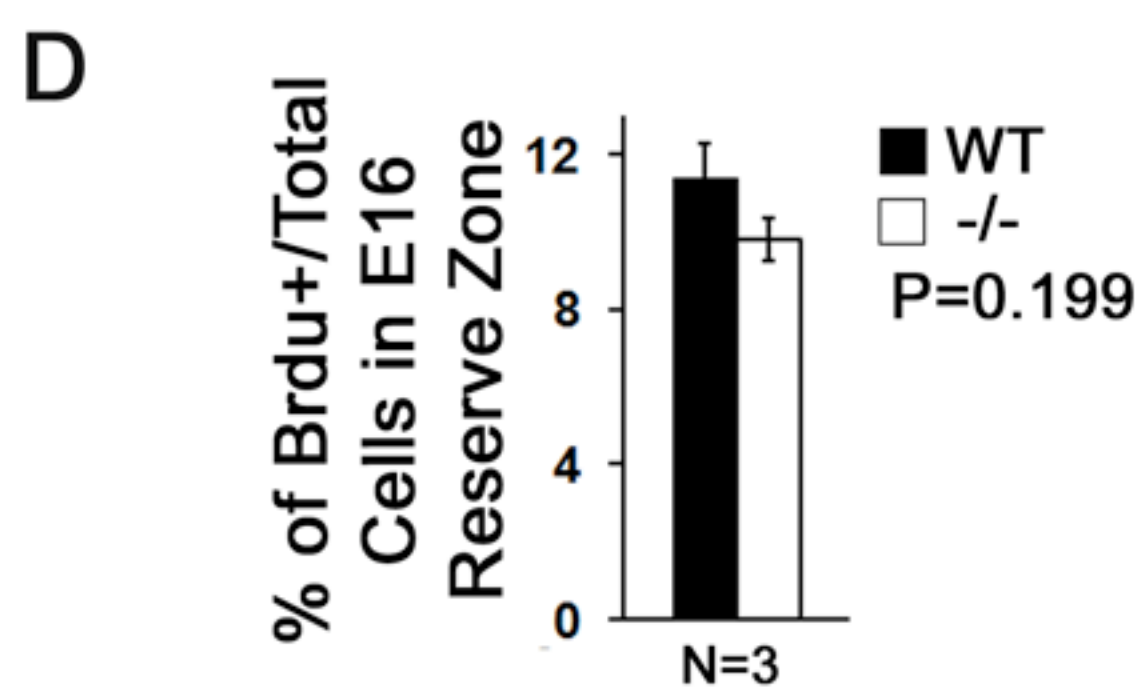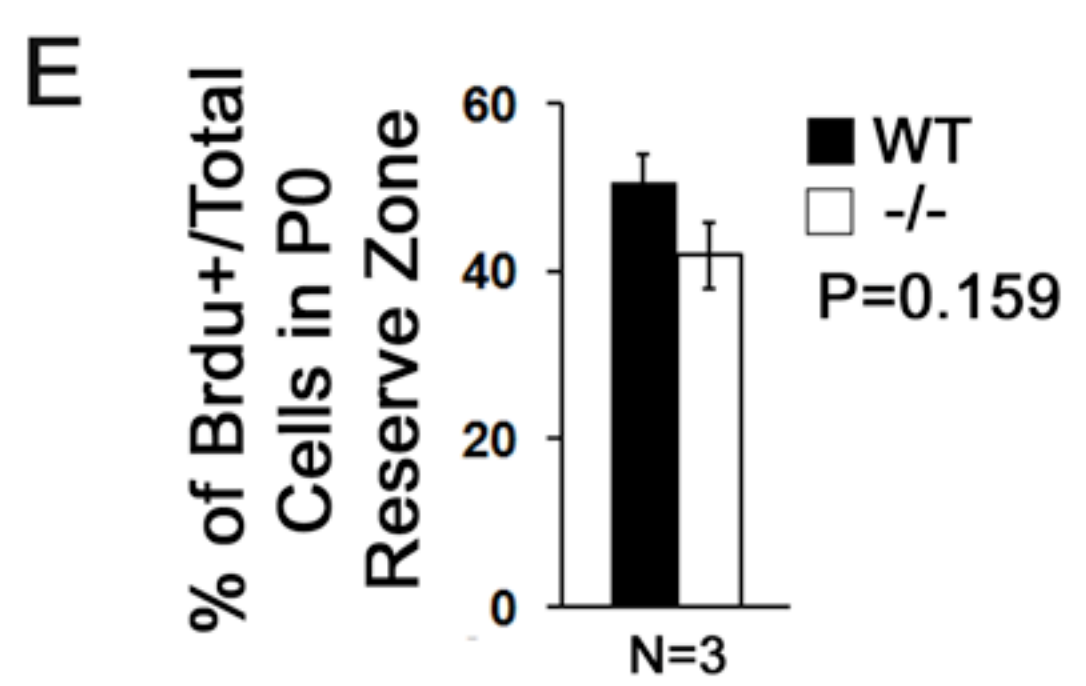

Supplement: supp_136_24_4143__1.pdf [file supp_136_24_4143__1.pdf]

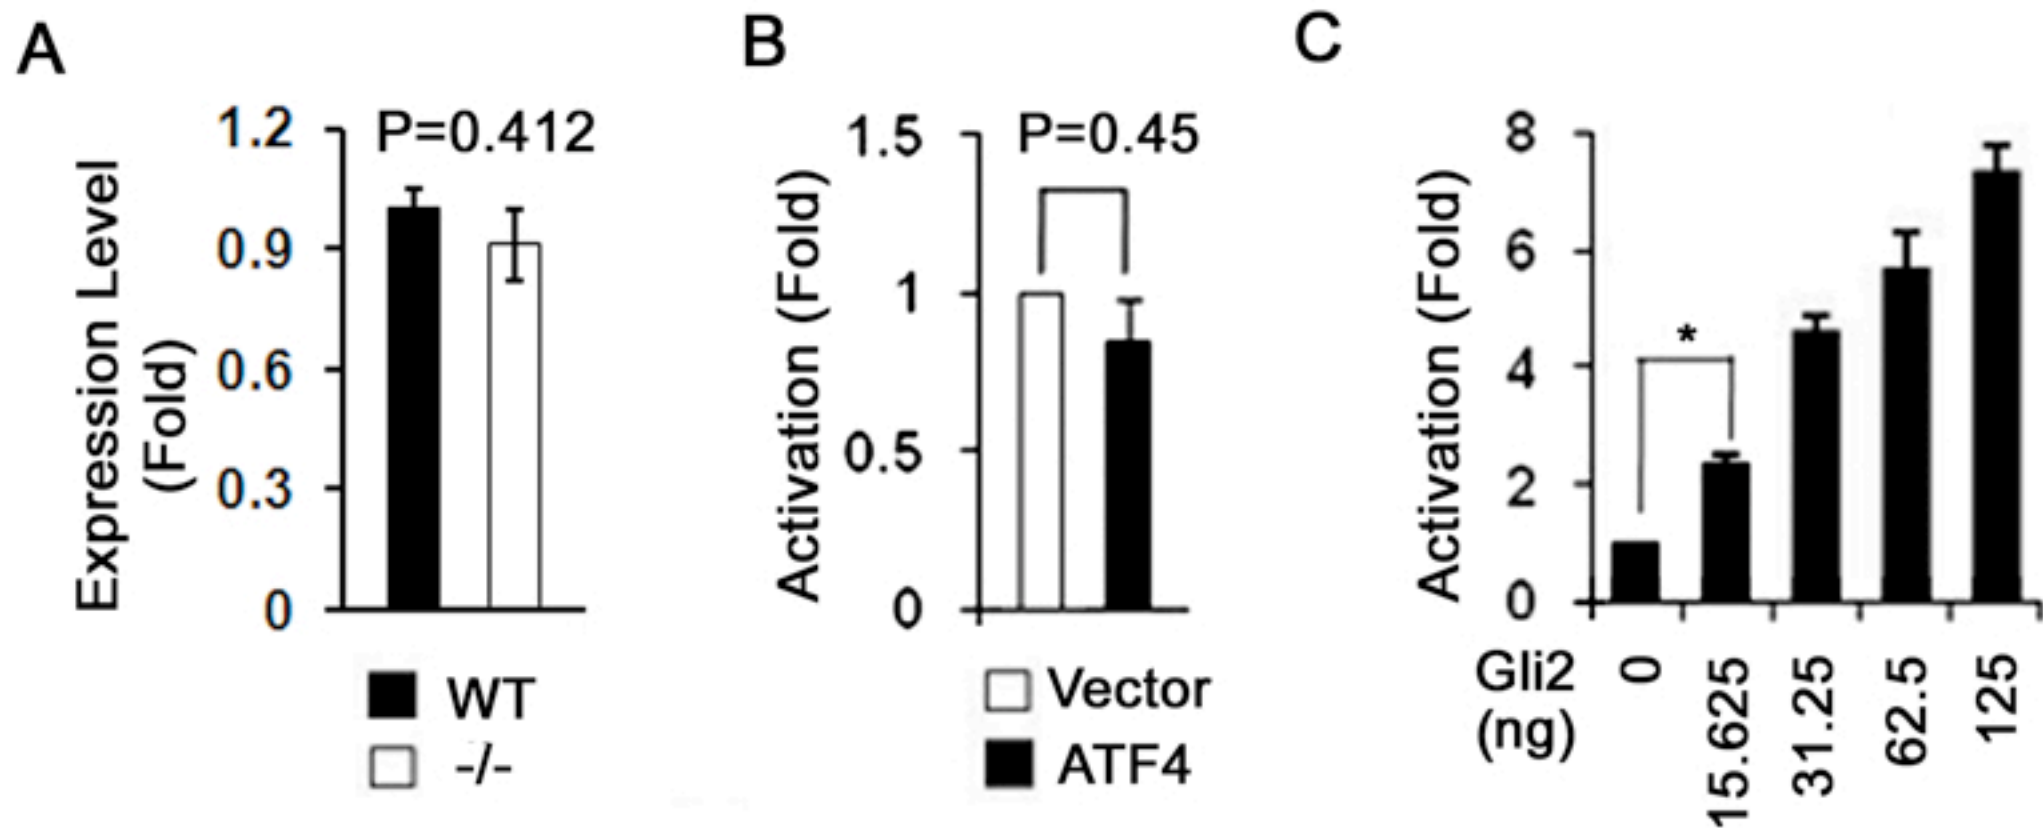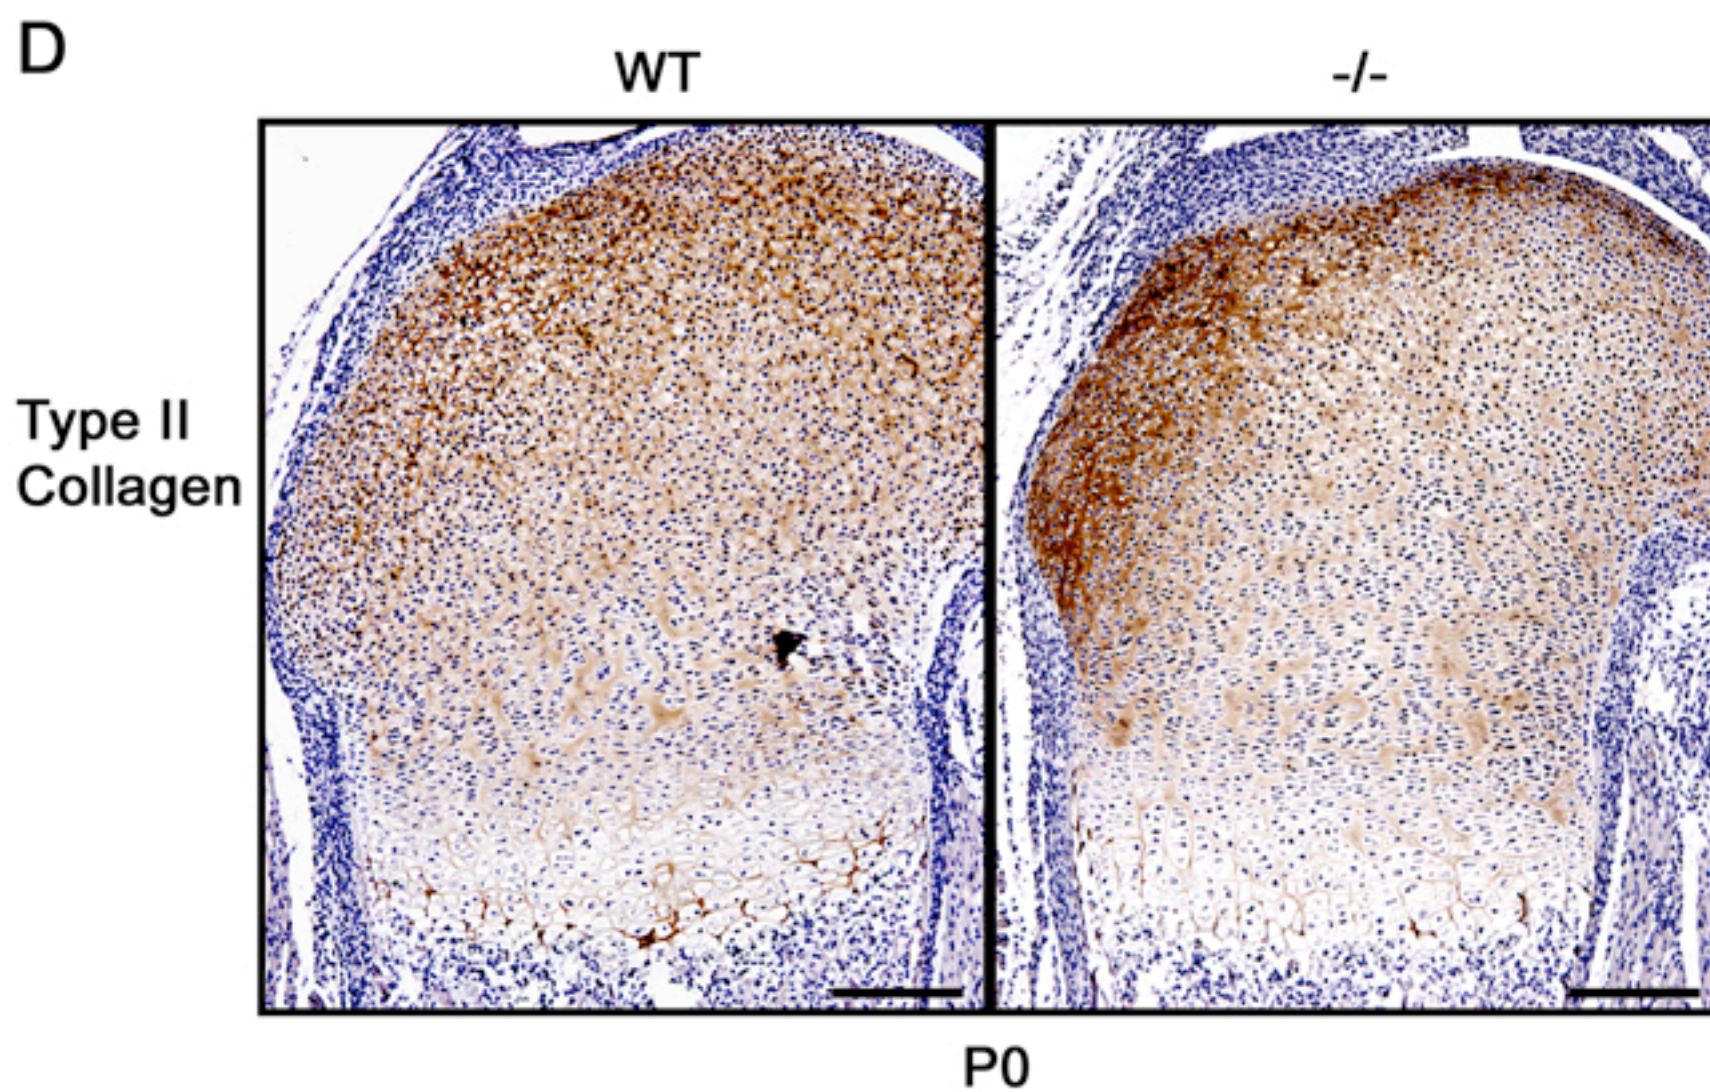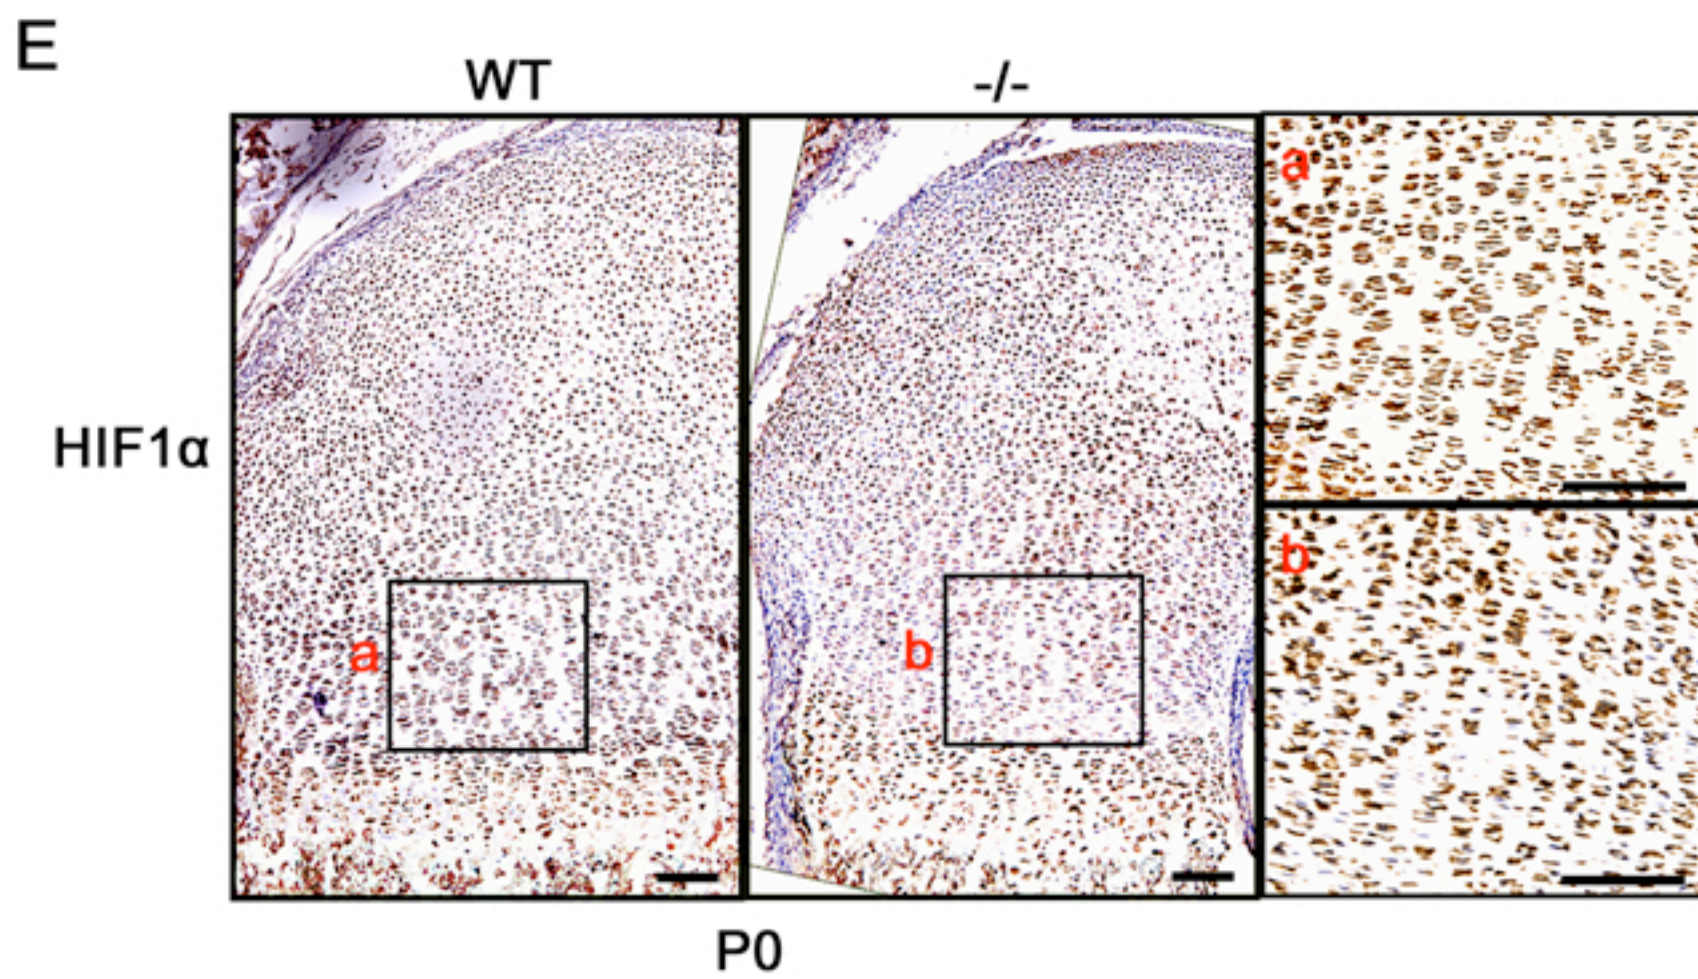

Supplement: supp_136_24_4143__2.pdf [file supp_136_24_4143__2.pdf]
